# Supplementary material
Source: MDPI journal article supplement (https://www.mdpi.com/2073-4441/13/13/1742)
Supplement: s1 [file s1]

**Table S3.** Comparative infection levels between males and females for *A. franciscana* hosts from Salar de Atacama lagoons and *A. persimilis* hosts from Patagonian lagoons in Chile. N, number of examined *Artemia* individuals; SE, standard error. FI-1, *Flamingolepis* sp.1; FI-2, *Flamingolepis* sp. 2; CP, *Confluaria podicipina*; Fsp, *Fimbriarioides* sp.; Wsp, *Wardium* sp; EA, *Eurycestus avoceti*; FA, *Fuhrmannolepis averini*; GS, *Gynandrotaenia stammeri*. Sex effects were analyzed using Z test for prevalence and Mann-Whitney U test for intensity and abundance.

|                                   | <i>A. franciscana</i> |                      |        |        |         | <i>A. persimilis</i> |                    |        |          |         |
|-----------------------------------|-----------------------|----------------------|--------|--------|---------|----------------------|--------------------|--------|----------|---------|
|                                   | Males<br>(N=539)      | Females<br>(N = 585) | Z      | U      | p-value | Males<br>(N=524)     | Females<br>(N=576) | Z      | U        | p-value |
| <b>Total infection</b>            |                       |                      |        |        |         |                      |                    |        |          |         |
| N infected                        | 21                    | 25                   |        |        |         | 55                   | 45                 |        |          |         |
| Prevalence %                      | 3.9                   | 4.3                  | 0.187  | -      | 0.852   | 10.5                 | 7.8                | 1.451  | -        | 0.147   |
| Mean intensity ±SE                | 1.6 ±0.52             | 1.08 ±0.06           | -      | 245    | 0.531   | 1.07 ±0.04           | 1.04 ±0.03         |        | 1224     | 0.862   |
| Intensity range                   | 1-12                  | 1-2                  | -      | -      | -       | 1-3                  | 1-2                | -      | -        | -       |
| Mean abundance ±SE                | 0.06 ±0.02            | 0.05 ±0.009          | -      | 157080 | 0.754   | 0.11 ± 0.02          | 0.08 ±0.01         | -      | 146848.5 | 0.127   |
| <b>Specific cestode infection</b> |                       |                      |        |        |         |                      |                    |        |          |         |
| Prevalence FI-1                   | 2.4                   | 3.8                  | 1.175  | -      | 0.240   | 4.2                  | 5.9                | -      | -        | -       |
| Prevalence FI-2                   | 0.4                   | 0.2                  | 0.0671 | -      | 0.946   | -                    | -                  | -      | -        | -       |
| Prevalence CP                     | -                     | -                    | -      | -      | -       | 1.0                  | 2.1                | 1.221  | -        | 0.222   |
| Prevalence Fsp                    | -                     | -                    | -      | -      | -       | 4.0                  | 1.9                | 1.893  | -        | 0.058   |
| Prevalence Wsp                    | -                     | -                    | -      | -      | -       | 0.2                  | 0                  | 0.0954 | -        | 0.924   |
| Prevalence EA                     | 0.2                   | 0.2                  | -0.668 | -      | 0.504   | -                    | -                  | -      | -        | -       |
| Prevalence FA                     | 0.9                   | 0                    | 1.844  | -      | 0.065   | -                    | -                  | -      | -        | -       |
| Prevalence GS                     | 0.2                   | 0.2                  | -0.668 | -      | 0.504   | -                    | -                  | -      | -        | -       |

(-) Denotes no available data
