# Supplementary material
Source: MDPI journal article supplement (https://www.mdpi.com/2073-4441/13/13/1742)
Supplement: s1 [file s1]

**Table S1.** Details of hypersaline aquatic ecosystems from Chile where no *Artemia* were found during the sampling visits in 2017 and 2018.

| Region / Locality                                             | Coordinates                  | Sampling date            | Temperature (°C) | Salinity (g/L) | pH     | Altitude (m) |
|---------------------------------------------------------------|------------------------------|--------------------------|------------------|----------------|--------|--------------|
| <b>North Chile- II Region-Antofagasta</b>                     |                              |                          |                  |                |        |              |
| Laguna Puilar PUI (Salar de Atacama, Atacama Desert)          | 23°18' 16.8''S, 68°08'22''W  | 04/11/2017<br>01/06/2018 | -<br>-           | 30<br>30       | -<br>- | 2,300        |
| Salar de Tara TAR (Atacama Desert)                            | 23°01'2.83''S, 67°19'11.9''W | 04/06/2018               | 3                | 10             | 8.3    | 4,322        |
| Salar de Pujsa PUJ (Atacama Desert)                           | 23°11'39''S, 67°32'41''W     | 04/06/2018               | < 0              | -              | -      | 4,500        |
| <b>Central Chile- VI Region-Libertador Bernardo O'Higgins</b> |                              |                          |                  |                |        |              |
| Salinas de La Villa LAV (Pichilemu, Cardenal Caro Province)   | 34°31'1.09''S, 71°58'51.1''W | 06/02/2018               | 26               | 70             | -      | 7            |
| Salinas de Boyeruca BOY (Cardenal Caro Province)              | 34°42.6'51''S, 72°1'56.4''W  | 03/02/2018               | -                | -              | -      | 6            |
| <b>South Chile- Region-Magallanes and Chilean Antarctica</b>  |                              |                          |                  |                |        |              |
| Laguna de La Sal LLS (Porvenir, Tierra del Fuego Island)      | 53°17'11.0''S, 70°23'34.1''W | 29/11/2017               | 17.3             | 360            | 7.2    | 0            |

(-) Denotes no available data
