# Supplementary material
Source: MDPI journal article supplement (https://www.mdpi.com/2073-4441/13/13/1742)
Supplement: s1 [file s1]

**Table S1. Waterbird abundance in Salar de Atacama lagoons (northern Chile) for the years 2017 and 2018. Abbreviations: CHA, Chaxa lagoon; BNE, Barros Negros lagoon; BUM, Burro Muerto channel; TEB, Tebenquiche lagoon. \* indicates boreal migratory species. X, uncounted.**

|                                  |                        | Salar de Atacama lagoons |            |                  |            |                  |            |                  |            |
|----------------------------------|------------------------|--------------------------|------------|------------------|------------|------------------|------------|------------------|------------|
| Sites                            |                        | CHA <sup>1</sup>         |            | BNE <sup>1</sup> |            | BUM <sup>1</sup> |            | TEB <sup>2</sup> |            |
| Bird Species                     | Common Name            | 2017                     | 2018       | 2017             | 2018       | 2017             | 2018       | 2017             | 2018       |
| ANSERIFORMES                     |                        |                          |            |                  |            |                  |            |                  |            |
| Fam. Anatidae                    |                        |                          |            |                  |            |                  |            |                  |            |
| <i>Lophonetta specularioides</i> | Crested Duck           |                          |            |                  |            |                  |            | 78               |            |
| CHARADRIFORMES                   |                        |                          |            |                  |            |                  |            |                  |            |
| Fam. Charadriidae                |                        |                          |            |                  |            |                  |            |                  |            |
| <i>Charadrius alticola</i>       | Puna Plover            | 2                        | 1          | 1                | 5          |                  |            | 59               | 12         |
| Fam. Laridae                     |                        |                          |            |                  |            |                  |            |                  |            |
| <i>Chroicocephalus serranus</i>  | Andean Gull            | 3                        | 14         |                  | 2          | 2                | 3          | 19               | 5          |
| Fam. Recurvirostridae            |                        |                          |            |                  |            |                  |            |                  |            |
| <i>Recurvirostra andina</i>      | Andean Avocet          | 22                       |            |                  | 12         | 41               | 114        | 57               | 34         |
| Fam. Scolopacidae                |                        |                          |            |                  |            |                  |            |                  |            |
| <i>Calidris bairdii</i> *        | Baird's Sandpiper      | 30                       | 11         | 4                | 12         | 14               | 49         | 216              | 17         |
| <i>Calidris melanotos</i>        | Pectoral Sandpiper     |                          |            |                  |            |                  |            |                  | 1          |
| <i>Calidris himantopus</i>       | Stilt Sandpiper        |                          |            |                  |            |                  |            | 7                |            |
| <i>Phalaropus tricolor</i> *     | Wilson's Phalarope     | 457                      | 1          |                  |            |                  |            | 119              | 2          |
| <i>Tringa flavipes</i> *         | Lesser Yellowlegs      |                          |            |                  |            |                  | 190        |                  |            |
| <i>Tringa melanoleuca</i> *      | Greater Yellowlegs     | 2                        |            | 1                |            |                  |            | 2                | X          |
| Unidentified sandpipers          |                        |                          |            |                  |            |                  |            | 2                |            |
| GRUIFORMES                       |                        |                          |            |                  |            |                  |            |                  |            |
| Fam. Rallidae                    |                        |                          |            |                  |            |                  |            |                  |            |
| <i>Fulica ardesiaca</i>          | Slate-colored Coot     |                          |            |                  |            |                  | 1          |                  |            |
| PASSERIFORMES                    |                        |                          |            |                  |            |                  |            |                  |            |
| Fam. Hirundinidae                |                        |                          |            |                  |            |                  |            |                  |            |
| <i>Pygochelidon cyanoleuca</i>   | Blue-and-white Swallow |                          | 30         |                  |            |                  |            |                  |            |
| PHOENICOPTERIFORMES              |                        |                          |            |                  |            |                  |            |                  |            |
| Fam. Phoenicopteridae            |                        |                          |            |                  |            |                  |            |                  |            |
| <i>Phoenicoparrus andinus</i>    | Andean Flamingo        | 20                       | 401        | 1                | 39         | 27               | 78         | 324              | 20         |
| <i>Phoenicoparrus jamesi</i>     | James's Flamingo       | 4                        | 18         |                  |            |                  |            | 5                | 23         |
| <i>Phoenicopus chilensis</i>     | Chilean Flamingo       | 81                       | 18         | 274              | 40         | 40               | 24         | 198              | 18         |
| Unidentified flamingos           |                        | 2                        |            | 7                |            |                  |            | 18               | 200        |
| <b>Total number</b>              |                        | <b>623</b>               | <b>494</b> | <b>288</b>       | <b>110</b> | <b>124</b>       | <b>459</b> | <b>1104</b>      | <b>332</b> |
| <b>Species richness</b>          |                        | <b>9</b>                 | <b>8</b>   | <b>5</b>         | <b>6</b>   | <b>5</b>         | <b>7</b>   | <b>11</b>        | <b>10</b>  |

<sup>1</sup>Data from censuses in April (austral autumn) extracted from the Informe de Seguimiento Ambiental: Cambios y Mejoras en la Operación Minera del Salar de Atacama. Región Antofagasta. Monitoreo Biotico 2020, Geobiota (GEOB.SQM611) available online at <https://snifa.sma.gob.cl/SeguimientoAmbiental/Ficha/108586>

<sup>2</sup>eBird. 2021. eBird Basic Dataset. Cornell Lab of Ornithology, Ithaca, New York. Data from all seasons combined.
